# Supplementary material
Source: publisher figshare collection journal article supplement (https://acs.figshare.com/ndownloader/files/7544224)
Supplement: Supplementary file 1 [file 7544224]

## SUPPORTING INFORMATION

# Whole-proteome peptide microarrays for profiling autoantibody repertoires within multiple sclerosis and narcolepsy

*Arash Zandian<sup>1</sup>, Björn Forsström<sup>1</sup>, Anna Häggmark-Månberg<sup>1</sup>,  
Jochen M. Schwenk<sup>1</sup>, Mathias Uhlén<sup>1</sup>, Peter Nilsson<sup>1</sup> and Burcu Ayoglu<sup>1,§,\*</sup>*

<sup>1</sup> **Address:** Affinity Proteomics, SciLifeLab, School of Biotechnology, KTH - Royal Institute of Technology, Stockholm, Sweden

§ **Current address:** Department of Medicine, Division of Immunology and Rheumatology, Stanford University School of Medicine, Stanford, California, USA

\***Corresponding author:** [burcu@kth.se](mailto:burcu@kth.se)

### TABLE OF CONTENTS

|                  |           |
|------------------|-----------|
| Table S-1 .....  | S-1       |
| Table S-2 .....  | S-2 – S-3 |
| Table S-3 .....  | S-4       |
| Figure S-1 ..... | S-5 – S-6 |
| Figure S-2 ..... | S-7       |
| Figure S-3 ..... | S-8       |
| Figure S-4 ..... | S-9       |
| Figure S-5 ..... | S-10      |
| Figure S-6 ..... | S-11      |

## Supplementary Tables

**Table S-1.** List of the peptide sequences which revealed the highest reactivity frequencies across all samples on the whole-proteome peptide microarrays shown in **Figure 2A**. Peptides which revealed antibody reactivity in nine or more samples are shown. There were two peptides for EGR2. Also note that the CCDS ID for one peptide has been withdrawn and therefore not shown here, but counted in **Figure 2A**. The column “position” indicates the region where the peptide corresponds to in the Uniprot protein sequence.

| Gene Names | UniProt ID | ENSG ID         | Peptide Sequence | Position  | Reactive Samples (n) |
|------------|------------|-----------------|------------------|-----------|----------------------|
| EGR2       | P11161     | ENSG00000122877 | QKERKSSAPSA      | 373-383   | 10                   |
| EGR2       | P11161     | ENSG00000122877 | KSSAPSASVPA      | 427-437   | 10                   |
| RRP8       | O43159     | ENSG00000132275 | KKCPKKASFASA     | 73-84     | 10                   |
| CHD7       | Q9P2D1     | ENSG00000171316 | ESEGKGSTFAKA     | 1501-1512 | 9                    |
| DIP2A      | Q14689     | ENSG00000160305 | PGGRPTTAPSA      | 187-197   | 9                    |
| DUSP8      | Q13202     | ENSG00000184545 | AALGKQASFSGS     | 607-618   | 9                    |
| FBXO16     | Q8IX29     | ENSG00000214050 | NSPEEKQSPLSA     | 187-198   | 9                    |
| GABRA3     | P34903     | ENSG00000011677 | TISKGAAPSASS     | 415-426   | 9                    |
| GMPPA      | Q96IJ6     | ENSG00000144591 | IHPTAKVAPSA      | 289-299   | 9                    |
| IFT88      | Q13099     | ENSG00000032742 | TGYGSKTSLASS     | 67-78     | 9                    |
| IPO5       | O00410     | ENSG00000065150 | ETYENIPGQSKI     | 49-60     | 9                    |
| KDM2B      | Q8NHM5     | ENSG00000089094 | GRPKGKLGPPASA    | 583-594   | 9                    |
| MADD       | Q8WXG6     | ENSG00000110514 | KGAREKATPFPS     | 871-882   | 9                    |
| MAST1      | Q9Y2H9     | ENSG00000105613 | APAKCSAPSSA      | 1513-1523 | 9                    |
| PIP5K1B    | O14986     | ENSG00000107242 | KTYKKTASSA       | 19-28     | 9                    |
| PNPLA7     | Q6ZV29     | ENSG00000130653 | QGPSKKPASA       | 1243-1252 | 9                    |
| RBM20      | Q5T481     | ENSG00000203867 | RLNNSKQGFIGA     | 367-378   | 9                    |
| SERTAD2    | Q14140     | ENSG00000179833 | SGTASKMAPVSA     | 265-276   | 9                    |
| SOX8       | P57073     | ENSG00000005513 | KSAPSASASPTTE    | 319-330   | 9                    |
| TBX21      | Q9UL17     | ENSG00000073861 | SRFYPDLPQAK      | 367-378   | 9                    |
| TCOF1      | Q13428     | ENSG00000070814 | PTPPGKTGPSA      | 913-923   | 9                    |
| TNFSF11    | O14788     | ENSG00000120659 | SCRRIKQAFQGA     | 115-126   | 9                    |
| WDR82      | Q6UXN9     | ENSG00000164091 | QFNPKFMTFASA     | 289-300   | 9                    |

**Table S-2. Extended list from Table 3, showing all peptide sequences (based on Figure 2B) that revealed differential serum/plasma reactivity frequencies among SPMS and narcolepsy sample collections.** The column “position” indicates the region where the peptide corresponds to in the Uniprot protein sequence. “Narcolepsy”, “SPMS” and “CIS” stand for the number of reactive samples within each patient group out of a total of 7, 8, and 8 samples, respectively.

| Differential peptide reactivity between narcolepsy vs. SPMS |         |                 |                  |           |            |      |     |        |        |        |
|-------------------------------------------------------------|---------|-----------------|------------------|-----------|------------|------|-----|--------|--------|--------|
| Gene                                                        | UniProt | ENSG            | Peptide sequence | Position  | Narcolepsy | SPMS | CIS | p-val# | p-valS | p-val§ |
| BCL6                                                        | P41182  | ENSG00000113916 | EGLKPAAPSA       | 23-32     | 7          | 2    | 4   | 0.01   | 0.08   | 0.61   |
| CNTN2                                                       | Q02246  | ENSG00000184144 | RDATKITLAPSS     | 506-517   | 7          | 2    | 4   | 0.01   | 0.08   | 0.61   |
| DYSF                                                        | O75923  | ENSG00000135636 | FPDPYTELNTGK     | 536-547   | 5          | 0    | 2   | 0.01   | 0.13   | 0.47   |
| NRXN1                                                       | Q9ULB1  | ENSG00000179915 | LHTGKSADYVNL     | 355-366   | 5          | 0    | 0   | 0.01   | 0.01   | 1.00   |
| RXRG                                                        | P48443  | ENSG00000143171 | SMSPSAALSTGK     | 26-37     | 5          | 0    | 1   | 0.01   | 0.04   | 1.00   |
| SCN5A                                                       | Q14524  | ENSG00000183873 | AMKKLGSKKPQK     | 1497-1508 | 5          | 0    | 0   | 0.01   | 0.01   | 1.00   |
| ABL2                                                        | P42684  | ENSG00000143322 | TQEGGKKAALGA     | 118-129   | 6          | 1    | 5   | 0.01   | 0.57   | 0.12   |
| RTN4                                                        | Q9NQC3  | ENSG00000115310 | MEAPLNSAVPSA     | 616-627   | 6          | 1    | 2   | 0.01   | 0.04   | 1.00   |
| SOCS7                                                       | O14512  | ENSG00000274211 | SSPGRGGGGGGR     | 12-23     | 6          | 1    | 5   | 0.01   | 0.57   | 0.12   |
| SOX11                                                       | P35716  | ENSG00000176887 | GGGAGGGAGGA      | 92-102    | 3          | 8    | 8   | 0.03   | 0.03   | 1.00   |
| GOLGA6L10                                                   | A6NI86  | ENSG00000278662 | VALDSSSAISQ      | 96-107    | 0          | 5    | 3   | 0.03   | 0.20   | 0.62   |
| MAP3K7                                                      | O43318  | ENSG00000135341 | SFMDIASTNTSN     | 65-76     | 0          | 5    | 2   | 0.03   | 0.47   | 0.31   |
| PDE8B                                                       | O95263  | ENSG00000113231 | FNRRFMENSSII     | 234-245   | 0          | 5    | 3   | 0.03   | 0.20   | 0.62   |
| PLCG2                                                       | P16885  | ENSG00000197943 | IIKHKKLGPRG      | 27-38     | 0          | 5    | 1   | 0.03   | 1.00   | 0.12   |
| SETX                                                        | Q7Z333  | ENSG00000107290 | DEEMSNSTSVI      | 924-934   | 0          | 5    | 0   | 0.03   | 1.00   | 0.03   |
| SYNJ2                                                       | O15056  | ENSG00000078269 | PYNVKQIKTTNA     | 30-41     | 0          | 5    | 2   | 0.03   | 0.47   | 0.31   |
| ADRBK2                                                      | P35626  | ENSG00000100077 | EARKRAKNKQLG     | 12-23     | 4          | 0    | 1   | 0.03   | 0.12   | 1.00   |
| BCL9L                                                       | Q86UU0  | ENSG00000186174 | PLGSNIPLHPNA     | 1168-1179 | 4          | 0    | 2   | 0.03   | 0.31   | 0.47   |
| CCDC6                                                       | Q16204  | ENSG00000108091 | GGGGGGKSG        | 33-41     | 4          | 0    | 1   | 0.03   | 0.12   | 1.00   |
| DNAJC2                                                      | Q99543  | ENSG00000105821 | KSTGGGGNGSKN     | 442-453   | 4          | 0    | 0   | 0.03   | 0.03   | 1.00   |
| DYSF                                                        | O75923  | ENSG00000135636 | PDPYTELNTGKG     | 537-548   | 4          | 0    | 1   | 0.03   | 0.12   | 1.00   |
| ENO1                                                        | P06733  | ENSG00000074800 | HINKTIAPALVS     | 68-79     | 4          | 0    | 0   | 0.03   | 0.03   | 1.00   |
| ERP29                                                       | P30040  | ENSG00000089248 | EELQKSLNILTA     | 239-250   | 4          | 0    | 2   | 0.03   | 0.31   | 0.47   |
| GRIN2A                                                      | Q12879  | ENSG00000183454 | FSPVSSKLSGKK     | 1329-1340 | 4          | 0    | 0   | 0.03   | 0.03   | 1.00   |
| GRIN2B                                                      | Q13224  | ENSG00000273079 | PTNSKAQKKNRN     | 1285-1296 | 4          | 0    | 0   | 0.03   | 0.03   | 1.00   |
| GRIN2B                                                      | Q13224  | ENSG00000273079 | KSSVPTAGHH       | 1353-1362 | 4          | 0    | 0   | 0.03   | 0.03   | 1.00   |
| HIPK2                                                       | Q9H2X6  | ENSG00000064393 | VYSQSKNIPLSQ     | 38-49     | 4          | 0    | 2   | 0.03   | 0.31   | 0.47   |
| NEK10                                                       | Q6ZWH5  | ENSG00000163491 | LPNKQKNAAKSN     | 85-96     | 4          | 0    | 3   | 0.03   | 0.62   | 0.20   |
| NRG1                                                        | Q02297  | ENSG00000157168 | SSTSTSTTGTS      | 167-178   | 4          | 0    | 2   | 0.03   | 0.31   | 0.47   |
| NRXN1                                                       | Q9ULB1  | ENSG00000179915 | GLMLHTGKSADY     | 352-363   | 4          | 0    | 1   | 0.03   | 0.12   | 1.00   |
| P4HA1                                                       | P13674  | ENSG00000122884 | GNLKYFEYIMAK     | 65-76     | 4          | 0    | 0   | 0.03   | 0.03   | 1.00   |
| PRKG2                                                       | Q13237  | ENSG00000138669 | REQLSKQTVAIA     | 9-20      | 4          | 0    | 2   | 0.03   | 0.31   | 0.47   |
| RAD23B                                                      | P54727  | ENSG00000119318 | TSSTTTTVAQA      | 100-110   | 4          | 0    | 1   | 0.03   | 0.12   | 1.00   |
| RARG                                                        | P13631  | ENSG00000172819 | DDSSQPGHPNA      | 13-24     | 4          | 0    | 2   | 0.03   | 0.31   | 0.47   |
| RGS12                                                       | O14924  | ENSG00000159788 | VVEEMQSGGIFN     | 137-148   | 4          | 0    | 3   | 0.03   | 0.62   | 0.20   |
| SLC9A3R1                                                    | O14745  | ENSG00000109062 | SPPKQDSTAPSS     | 81-92     | 4          | 0    | 1   | 0.03   | 0.12   | 1.00   |

|           |        |                 |               |           |   |   |   |      |      |      |
|-----------|--------|-----------------|---------------|-----------|---|---|---|------|------|------|
| SPTAN1    | Q13813 | ENSG00000197694 | IQGVLDTGKKLS  | 1820-1831 | 4 | 0 | 1 | 0.03 | 0.12 | 1.00 |
| SPTAN1    | Q13813 | ENSG00000197694 | AIQGVLDTGKKL  | 1819-1830 | 4 | 0 | 2 | 0.03 | 0.31 | 0.47 |
| SPTAN1    | Q13813 | ENSG00000197694 | EPAIQGVLDTGK  | 1817-1828 | 4 | 0 | 1 | 0.03 | 0.12 | 1.00 |
| SPTAN1    | Q13813 | ENSG00000197694 | LDTGKKLSDDNT  | 1824-1835 | 4 | 0 | 0 | 0.03 | 0.03 | 1.00 |
| UBE2E2    | Q96LR5 | ENSG00000182247 | PKKKEGKISSKT  | 37-48     | 4 | 0 | 0 | 0.03 | 0.03 | 1.00 |
| USP8      | P40818 | ENSG00000138592 | PQIDRTKKPAVK  | 405-416   | 4 | 0 | 0 | 0.03 | 0.03 | 1.00 |
| VIL1      | P09327 | ENSG00000127831 | SQITAEVTSPOV  | 739-750   | 4 | 0 | 1 | 0.03 | 0.12 | 1.00 |
| SLC4A5    | Q9BY07 | ENSG00000188687 | GGAGSGGAGGTS  | 454-465   | 2 | 7 | 5 | 0.04 | 0.31 | 0.57 |
| ATP10A    | O60312 | ENSG00000206190 | ASMLSKHTAFSS  | 50-61     | 6 | 2 | 1 | 0.04 | 0.01 | 1.00 |
| BPTF      | Q12830 | ENSG00000171634 | TSAPGRGGRGGG  | 81-92     | 6 | 2 | 4 | 0.04 | 0.28 | 0.61 |
| BRD2      | P25440 | ENSG00000204256 | KKGAKLAALQGS  | 19-30     | 6 | 2 | 3 | 0.04 | 0.12 | 1.00 |
| CCDC6     | Q16204 | ENSG00000108091 | SSTSGGGGGG    | 28-37     | 6 | 2 | 5 | 0.04 | 0.57 | 0.31 |
| EGR1      | P18146 | ENSG00000120738 | GGGGGGGSN     | 70-78     | 6 | 2 | 3 | 0.04 | 0.12 | 1.00 |
| FUS       | P35637 | ENSG00000089280 | QYNSSSGGGG    | 75-84     | 6 | 2 | 6 | 0.04 | 1.00 | 0.13 |
| HNRNPA1L2 | Q32P51 | ENSG00000139675 | FGNDGSNFGGGG  | 247-258   | 6 | 2 | 2 | 0.04 | 0.04 | 1.00 |
| NEFM      | P07197 | ENSG00000104722 | AAEQNKPAIRSA  | 302-313   | 6 | 2 | 4 | 0.04 | 0.28 | 0.61 |
| NFKB1     | P19838 | ENSG00000109320 | FGSGGGGGGTG   | 389-399   | 6 | 2 | 4 | 0.04 | 0.28 | 0.61 |
| RIPK1     | Q13546 | ENSG00000137275 | NTEGKGTAAYSSA | 126-137   | 6 | 2 | 4 | 0.04 | 0.28 | 0.61 |
| RNF115    | Q9Y4L5 | ENSG00000265491 | VTDDSSFLGGGG  | 49-60     | 6 | 2 | 4 | 0.04 | 0.28 | 0.61 |
| STK19     | P49842 | ENSG00000204344 | ANPSRGGGG     | 14-22     | 6 | 2 | 4 | 0.04 | 0.28 | 0.61 |
| ADGRG6    | Q86SQ4 | ENSG00000112414 | NSPSTTPPTVT   | 383-393   | 5 | 1 | 2 | 0.04 | 0.13 | 1.00 |
| BNC1      | Q01954 | ENSG00000169594 | QNPNLHKSLASS  | 978-989   | 5 | 1 | 4 | 0.04 | 0.61 | 0.28 |
| ENO1      | P06733 | ENSG00000074800 | DWGAWQKFTASA  | 300-311   | 5 | 1 | 3 | 0.04 | 0.31 | 0.57 |
| FASTKD5   | Q7L8L6 | ENSG00000215251 | GLEFSKTSSSKA  | 77-88     | 5 | 1 | 1 | 0.04 | 0.04 | 1.00 |
| KIAA1462  | Q9P266 | ENSG00000165757 | REDNPKGRQAAR  | 23-34     | 5 | 1 | 3 | 0.04 | 0.31 | 0.57 |
| PRMT5     | O14744 | ENSG00000100462 | VLGAGRGPLVNA  | 19-30     | 5 | 1 | 2 | 0.04 | 0.13 | 1.00 |
| SIPA1     | Q96FS4 | ENSG00000213445 | PAFGPALPAGGG  | 484-495   | 5 | 1 | 3 | 0.04 | 0.31 | 0.57 |
| UBE2E2    | Q96LR5 | ENSG00000182247 | KKKEGKISSKTA  | 38-49     | 5 | 1 | 4 | 0.04 | 0.61 | 0.28 |
| USP32     | Q8NFA0 | ENSG00000170832 | VLNGGKYSFGTA  | 8-19      | 5 | 1 | 1 | 0.04 | 0.04 | 1.00 |

# p-value from Fisher's exact test comparing narcolepsy vs. SPMS

\$ p-value from Fisher's exact test comparing narcolepsy vs. CIS

§ p-value from Fisher's exact test comparing SPMS vs. CIS

**Table S-3.** Number of different single peptide epitopes, consecutive peptide epitopes, and differences in reactivity per protein among the different sample groups on the targeted design arrays.

|                                | <b>Single Peptide<br/>Epitopes</b> | <b>Consecutive Peptide<br/>Epitopes</b> | <b>Proteins</b> |
|--------------------------------|------------------------------------|-----------------------------------------|-----------------|
| <b>Narcolepsy vs. SPMS</b>     | 65                                 | 5                                       | 41              |
| <b>Narcolepsy vs. CIS</b>      | 45                                 | 6                                       | 36              |
| <b>Narcolepsy vs. SPMS+CIS</b> | 202                                | 11                                      | 37              |
| <b>SPMS vs. CIS</b>            | 9                                  | 2                                       | 15              |
| <b>Total (unique)</b>          | 321 (244)                          | 24 (16)                                 | 129 (88)        |

### ***Supplementary Information***

Potential zone variation is an important parameter to address when utilizing the planar peptide arrays. We eliminated the impact of any potential zone variation by taking into account the local spot background for the analysis of individual spots, as described in the Materials & Methods section. Below we provide an analysis demonstrating our strategy, where two different representative samples from the SPMS and CIS patient groups were analyzed on the opposite corners on the targeted 174k peptide microarrays.

**Figure S-1** shows the data for the first sample belonging to an SPMS patient, which was analyzed on the top left corner of the targeted 174k peptide microarray.

Panel A illustrates the local MFI of the entire subarray, which was calculated by using a sliding window of 7x7 spots/position, i.e. 25 or 24 peptide-containing spots (because of the checkerboard pattern the peptides are synthesized in). The column position and row position of the subarray are shown in panel B and C. As can be seen in Panel A, there are some regions with higher local MFI (darker color). Yet, the distribution of the number of reactive peptide spots (passing the filtering criterion we describe in the Materials & Methods section) is even. Panel B shows the density distribution of reactive peptide spots (black line) per column position on the subarray, and the density seems to be rather stable in all column positions, which is expected since the spatial peptide positions are randomly assigned when the peptide microarrays are synthesized. The median local MFI calculated on the median per column position are shown as filled points (Panel B), where a slight fluctuation around column position 350 can be seen. However, the number of reactive peptide spots are fairly stable (black line).

Similarly, Panel C shows the density distribution of reactive peptide spots (black line) per row position on the subarray, where the local MFI decreases from the higher row positions (800) towards the lower row (0) positions, i.e. there is a gradient. Yet, the distribution of the reactive spots passing the filtering criterion are rather stable (black line) even though the median local MFI is varying (up to 25% from the top to bottom, ~500 MFI vs. 400 MFI). Finally, one can see that we find slightly more reactive spots in areas where the background is lower, which could be expected since lower signals can more easily be distinguished from noise. To support the conclusions which can be drawn by this analysis, we also included a **Figure S-2** below, representing the same analysis for a CIS sample which was screened on the bottom right corner of the same 174k peptide microarray slide. These two figures demonstrate that when we use the local background MFI, as well as spot morphology to assess the peptide spot reactivity, our downstream data analysis is not susceptible to differences in zone variation in and between subarrays.

## Supplementary Figures

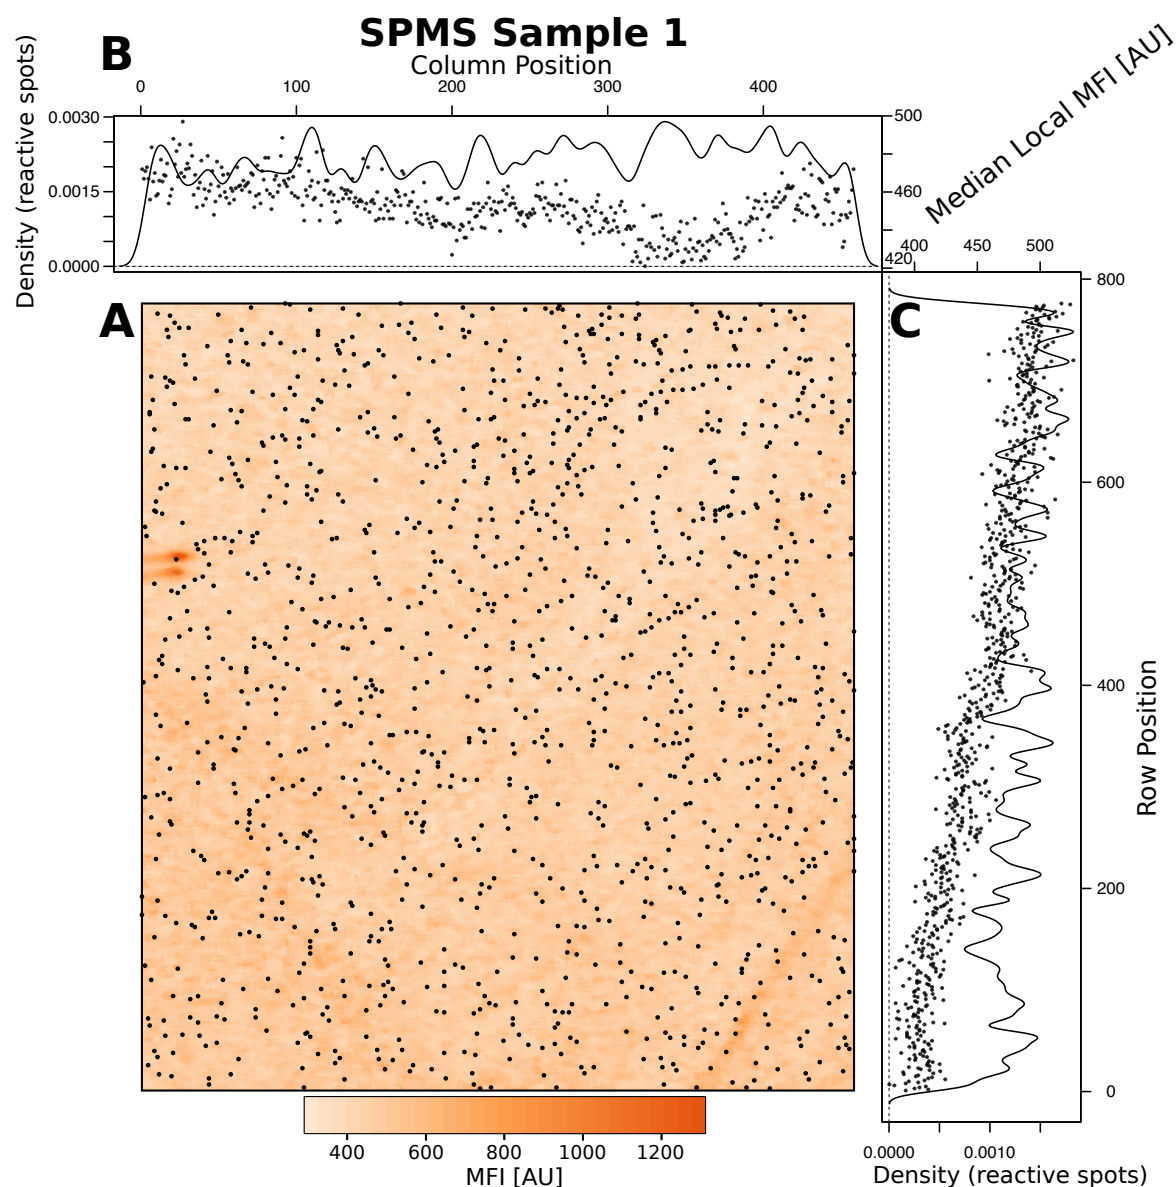

**Figure S-1. Signal intensity gradient and peptide selection map for a subarray, where an SPMS sample was analyzed.** An SPMS patient sample was analyzed on the 174k peptide microarrays, **A**) where the entire subarray was colored by the median signal intensity in a 7x7 spots sliding window with signals higher than the local background shown as filled black dots. The density of signal intensities above the local background, which have been considered as positive reactivity, are shown in density line graphs as a function of column or row position (**B** and **C**). The median local MFI per column position and row positions are also shown as filled black dots in **B** and **C**.

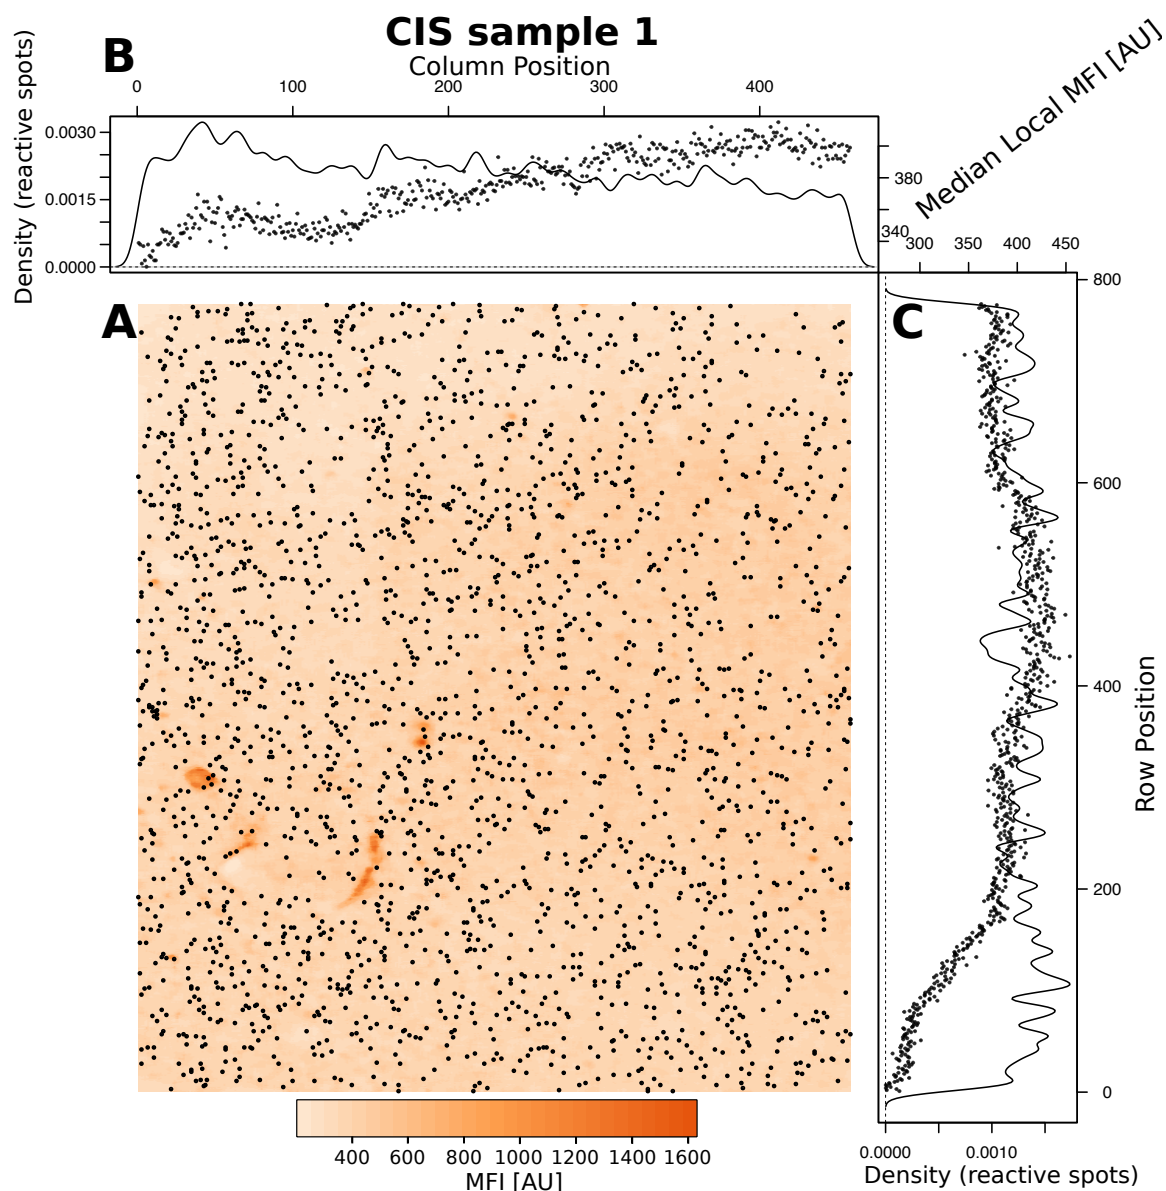

**Figure S-2. Signal intensity gradient and peptide selection map for a subarray, where a CIS sample was analyzed.** A CIS patient sample was analyzed on the 174k peptide microarrays, **A)** where the entire subarray was colored by the median signal intensity in a 7x7 spots sliding window with signals higher than the local background shown as filled black dots. The density of signal intensities above the local background, which have been considered as positive reactivity, are shown in density line graphs as a function of column or row position (**B** and **C**). The median local MFI per column position and row positions are also shown as filled black dots in **B** and **C**.



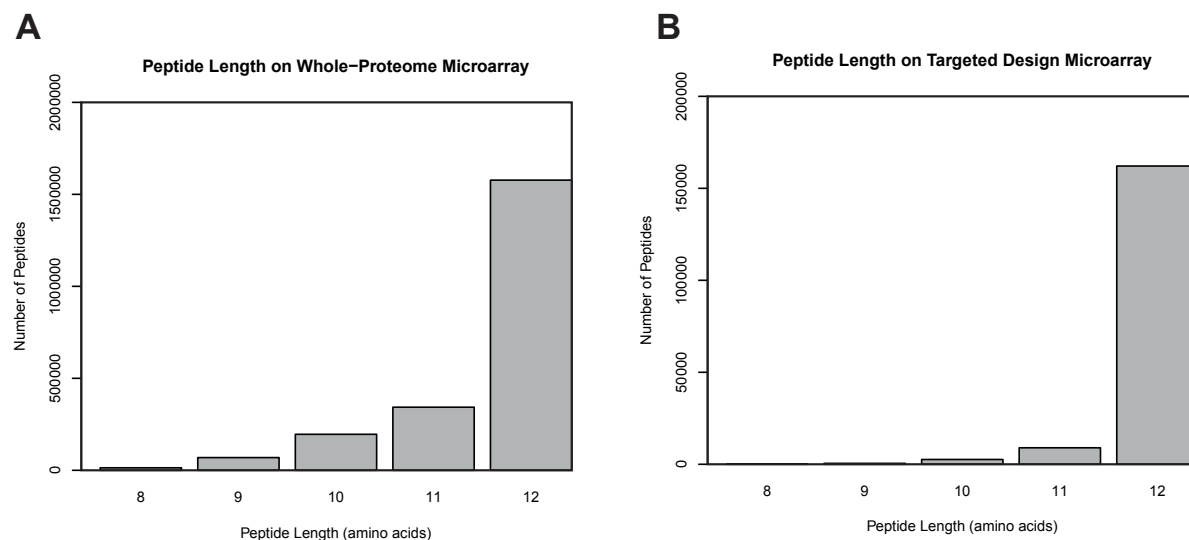

**Figure S-3. Distribution of peptide length on the planar microarrays.** The peptide length distribution of all the peptides synthesized on the whole-proteome peptide microarray (**A**) the targeted design microarray (**B**). Due to maximum synthesis cycles in the generation of the planar peptide microarrays, not all peptides could be synthesized as 12-mers.

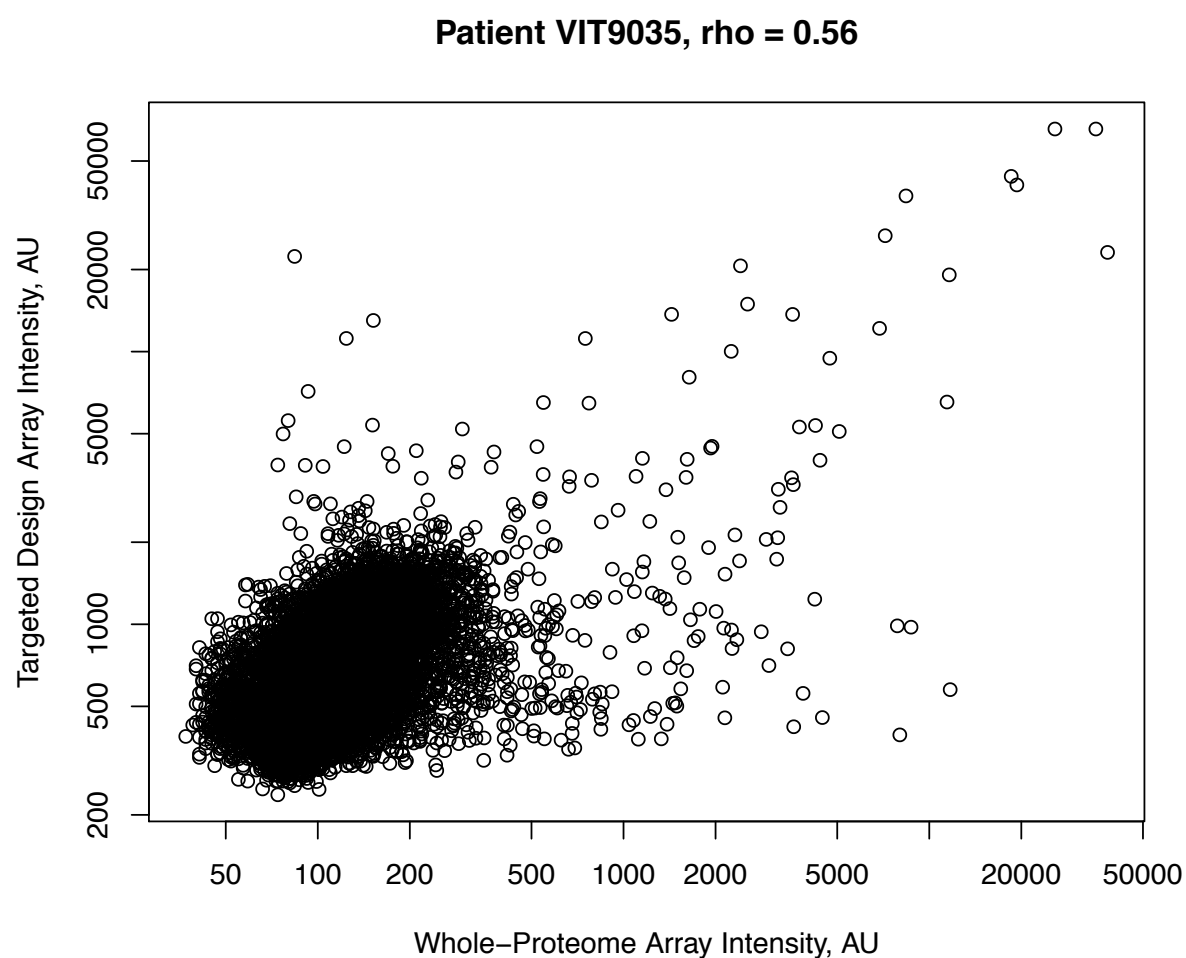

**Figure S-4. Data correlation between whole-proteome and targeted design planar microarrays.** Correlation of the antibody reactivity in an individual narcolepsy sample towards 23,072 peptides, which overlapped between the whole-proteome microarray and the array with targeted design. Each dot represents a peptide and the Spearman's rho is indicated.

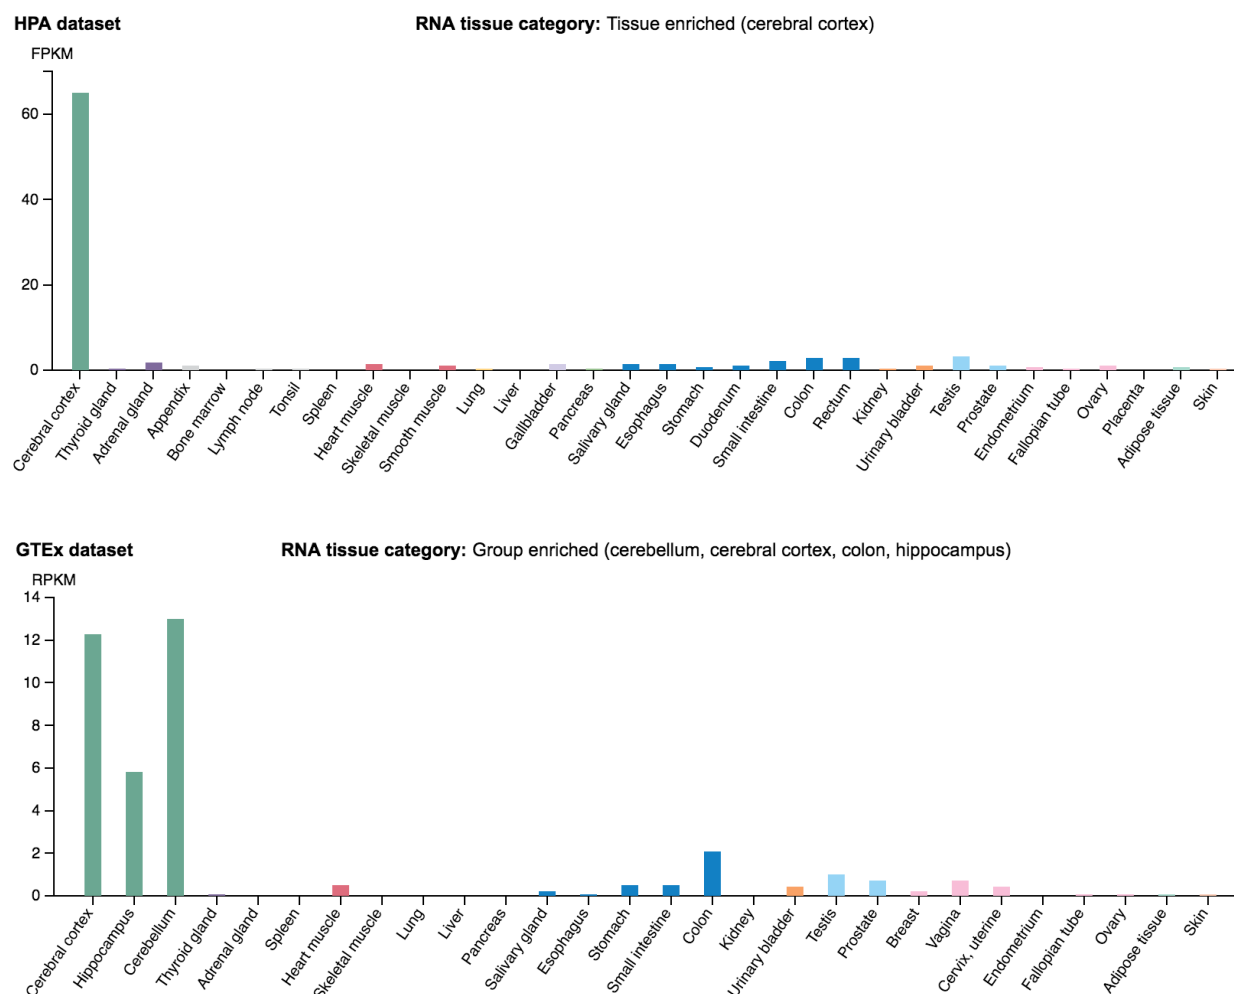

**Figure S-5. Tissue-specific transcriptome data available for NRXN1 in two different publicly available data portals.** Data available for RNA expression of NRXN1 in various human tissue types by the Human Protein Atlas portal ([www.proteinatlas.org](http://www.proteinatlas.org)) and the GTEx Portal ([www.gtexportal.org](http://www.gtexportal.org)).

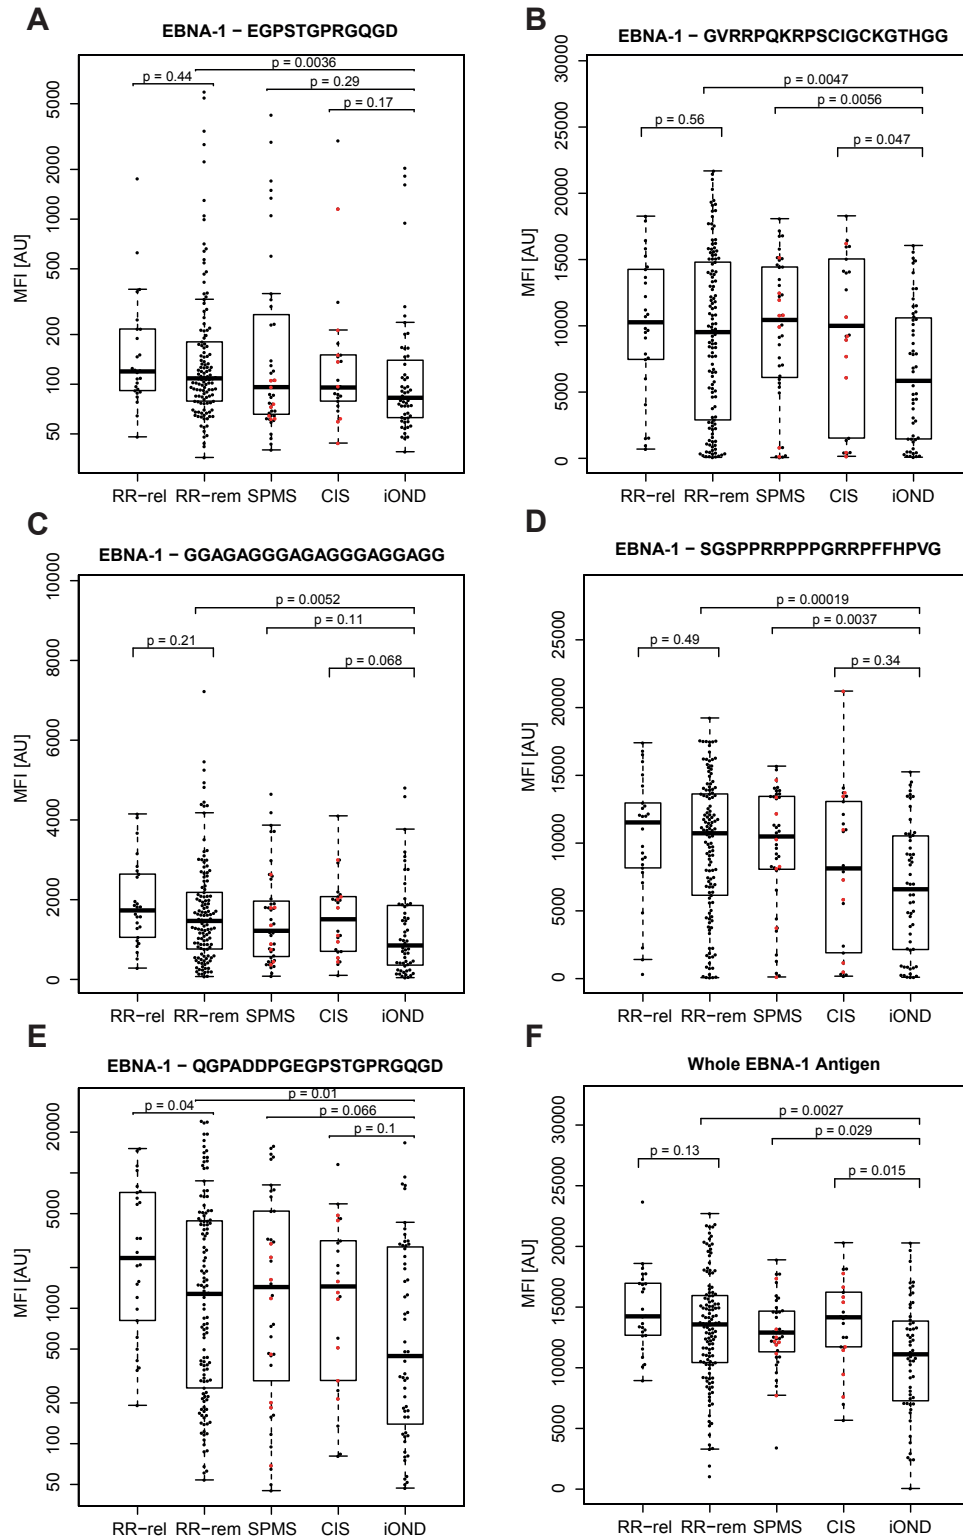

**Figure S-6. Antibody reactivity towards six different EBNA-1 protein and peptides within MS-related sample set.** The peptide EGPSTGPRGQGD (**A**) represents the region 444-455 of EBNA-1, the peptide GVRRPQKRPSICGCKGTHGG (**B**) represents the region 69-80 of EBNA1, the peptide GGAGAGGGAGAGGGAGG (**C**) represents the region 122-141 of EBNA1, the peptide SGSPRRPPPGRRPFFHPVG (**D**) represents the region 391-410 of EBNA1, the peptide QGPADDPGEGPSTGPRGQGD (**E**) represents the region 436-455 of EBNA1. In addition, antibody reactivity towards the full-length EBNA-1 protein was analyzed (**F**).
